# Supplementary material
Source: Research Square preprint supplement (doi:10.21203/rs.3.rs-9446142/v1)
Supplement: Supplementary file 1 [file 9bacd75cb04652f54e3703ac.docx]

**Supplementary files**

**Table 1: Reproductive characteristics of women (n=941) aged 30-49 in Peripheral settings, Ethiopia, 2023**

| Variable | Frequency | Percent |
| --- | --- | --- |
| Age started sexual intercourse (in years) |  |  |
| ≤18 | 276 | 29.3 |
| >18 | 665 | 70.7 |
| Multiple sexual partners |  |  |
| No | 740 | 78.6 |
| Yes | 201 | 21.4 |
| Parity |  |  |
| <3 | 461 | 48.99 |
| 3-4 | 150 | 15.94 |
| ≥5 | 330 | 35.07 |
| Gr-avidity |  |  |
| <3 | 355 | 37.73 |
| 3-4 | 193 | 20.51 |
| ≥5 | 393 | 41.76 |
| Ever use a modern FP method |  |  |
| Yes | 598 | 63.5 |
| No | 343 | 36.5 |
| Current use of OCP |  |  |
| Yes | 108 | 11.5 |
| No | 833 | 88.5 |
| Family history of cervical cancer |  |  |
| Yes | 111 | 11.8 |
| No | 830 | 88.2 |
| Lifetime history of STD |  |  |
| Yes | 70 | 7.4 |
| No | 871 | 92.6 |
| History of smoking |  |  |
| Yes | 11 | 1.2 |
| No | 930 | 98.8 |
| Currently smoker |  |  |
| Yes | 3 | 0.3 |
| No | 938 | 99.7 |

**Table 2: Health-seeking behavior of women (n-941) aged 30-49 in Peripheral settings, Ethiopia, 2023**

| Variables | Frequency | Percent |
| --- | --- | --- |
| Frequency of health care visit | | |
| Twice a year  Once a year  Less than a year but twice in the past  *Other | 271  311  214  145 | 28.8  33.05  22.74  15.41 |
| Usual health care facility chosen when got sick | | |
| Government hospital | 645 | 68.54 |
| Health centre | 177 | 18.81 |
| **Other | 119 | 12.65 |
| Satisfaction status of participants | | |
| Satisfied  Not satisfied | 623  318 | 66.21  33.8 |
| best way used to make you more aware of CC | | |
| Health education at health facility | 349 | 37.09 |
| Health extension advice | 294 | 31.24 |
| ***Other | 298 | 31.67 |
| cultural issues hindering CCS | | |
| Yes | 159 | 17.08 |
| No | 772 | 82.92 |
| which culture contribute | | |
| religious Factors (Islamic culture)  the taboo of showing private part | 35  124 | 22.01  77.99 |
| Screening offered in the facility | | |
| Yes | 230 | 24.68 |
| No | 702 | 75.32 |
| Service satisfaction | | |
| Excellent | 66 | 28.70 |
| Good | 137 | 59.57 |
| Poor | 27 | 11.74 |
| Behaviour of health care provider | | |
| Excellent | 67 | 29.13 |
| Good | 142 | 61.74 |
| Poor | 21 | 9.13 |
| Affordability of screening | | |
| Yes | 183 | 79.57 |
| No | 47 | 20.43 |
| Waiting time | | |
| 0-15 minutes  15-30 minutes  > 30 minutes | 25  102  103 | 10.87  44.35  44.78 |
| To reach to the facility | | |
| <1 hour  1 hour  don’t know | 135  72  23 | 58.70  31.30  10.00 |

*Note * Means once in the past 5 years and not in the past year** mean private clinic, traditional healers and pharmacy ***mean printing media I.e magazine and newspaper, social media I.e face book, telegram you tube, TV and radio and health care provider advice.*

**Table 3: Social Support of women (n-941) aged 30-49 in Peripheral settings Ethiopia, 2023**

| Items | Overall  941(%) | Screened  235(%) | Not screened  706 (%) |
| --- | --- | --- | --- |
| Can you share concerns with a health care provider? | 578(61.42) | 177(75.32) | 401(56.80) |
| Get counselling from health care providers | 285(30.29) | 146(62.13) | 139(19.69) |
| Financial support from family member | 298(31.67) | 116(49.36) | 182(25.78) |
| Emotional support | 251(26.67) | 112(47.66) | 139(19.69) |
| Can discuss with family | 296(31.46) | 132(56.17) | 164(23.23) |
| Family encouragement | 197(20.94) | 100(42.55) | 97(13.74) |
| Friends recommendation | 231(24.55) | 94(40) | 137(19.41) |
| Friends support | 492(52.28) | 154(65.53) | 338(47.88) |
| Friends can share the result | 479(50.9) | 175(74.47) | 304(43.06) |
| Advice friends to have screening | 471(50.05) | 160(68.09) | 311(44.05) |
| Social support networks  Perceived social support  Not Perceived social support | 465(49.42)  476(50.58) | 168(71.49)  67(28.51) | 297(42.07)  409(57.93) |

**Table 4: Cultural barriers to screening (communication culture of women with their partner) (n-941) aged 30-49 in Peripheral settings Ethiopia, 2023**

| Items | Overall  941(%) | Screened  235(%) | Not screened  706 (%) |
| --- | --- | --- | --- |
| Would feel comfortable to talk about any gynaecological issues | 529(56.22) | 145(61.70) | 384(54.39) |
| Can talk about anything | 507(53.88) | 152(64.68) | 355(50.28) |
| The topic of sex is taboo between me and my husband | 315(33.48) | 129(54.89) | 186(26.35) |
| Discussed about Importance of getting screened Cc | 167(17.75) | 98(41.70) | 69(9.77) |
| Comfortable with Male health care provider | 395(41.98) | 111(47.23) | 284(40.23) |
| Comfortable with female health care provider | 621(65.99) | 187(79.57) | 434(61.47) |
| Comfortable with discussing about sexuality | 331(35.18) | 140(59.57) | 191(27.05) |
| Could discuss it easily with close female friends | 530(56.32) | 157(66.81) | 373(52.83) |
| Embarrass gynaecological examination | 258(27.42) | 68(28.94) | 190(26.91) |
| Embarrass health care provider examining my body | 248(26.35) | 57(24.26) | 191(27.05) |
| I am modest | 248(26.35) | 64(27.23) | 184(26.06) |
| Uncomfortable discussing with female friends about | 229(24.34) | 77(32.77) | 152(21.53) |
| Usually take western medicine | 506(53.77) | 104(44.26) | 402(56.94) |
| Usually take traditional medicine | 238(25.29) | 59(25.11) | 179(25.35) |
| Traditional medicine is more effective | 235(24.97) | 62(26.38) | 173(24.5) |
| Cultural barriers to screening  Have cultural barriers  Have no cultural barriers | 560(59.51)  381(40.49) | 173(73.62)  62(26.38) | 387(54.82)  319(45.18) |
